# Supplementary material
Source: Springer Nature journal article supplement (https://www.springermedizin.de/resource/supplementary/12943_2010_801_MOESM7_ESM.pdf/9554864)

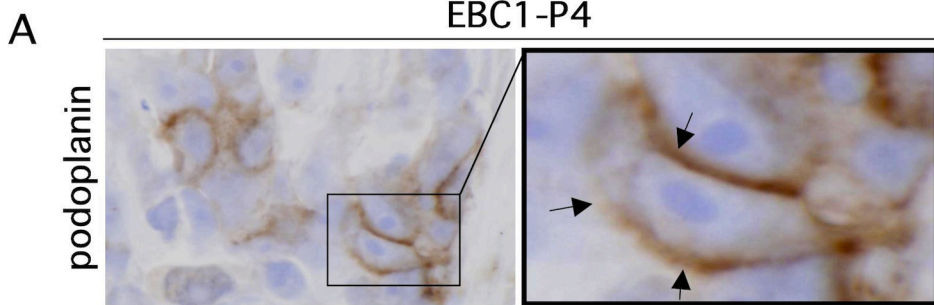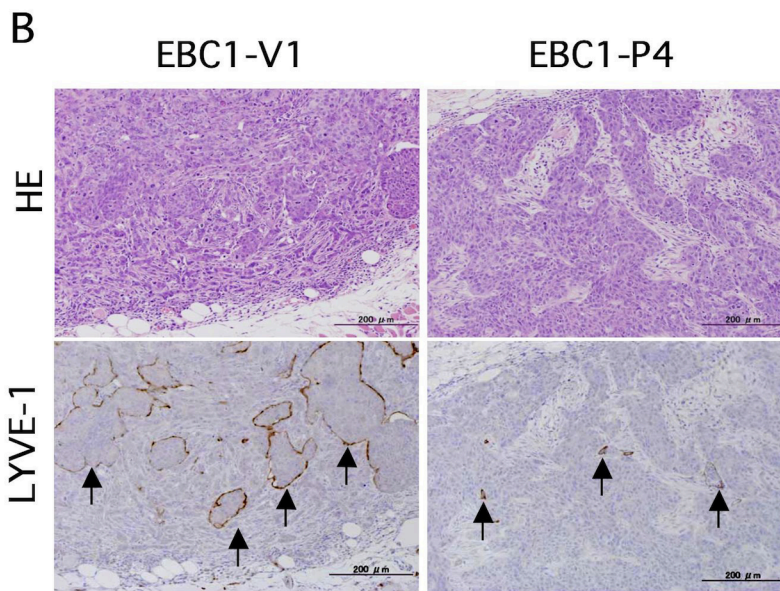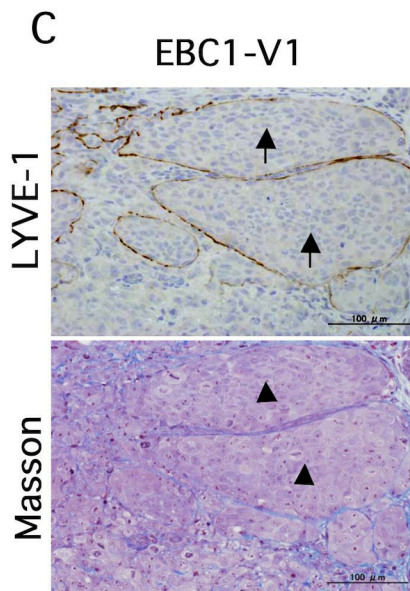

**D** LYVE-1 positive vessels

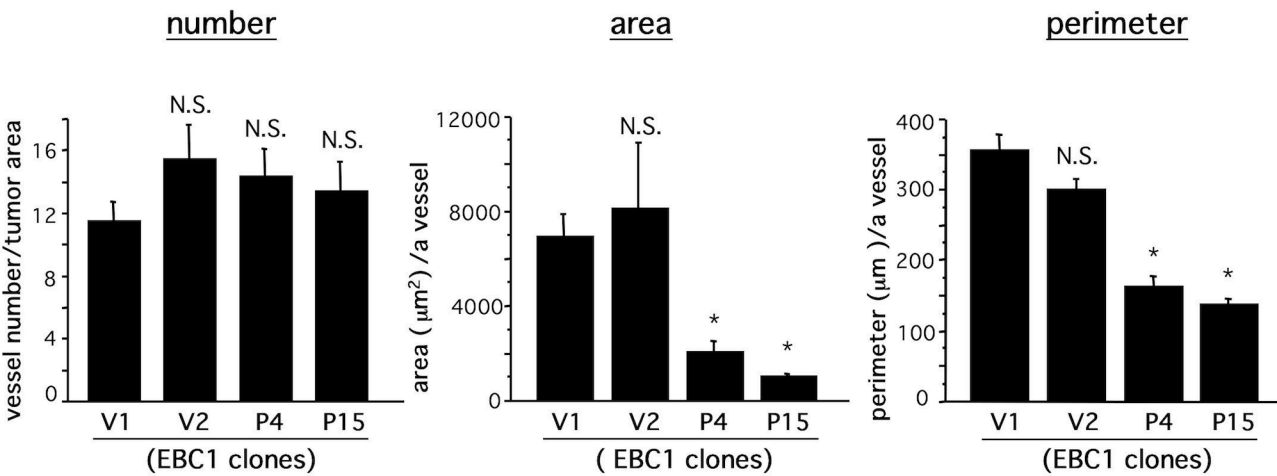

Supplement: MOESM7 [file 9554864]
